# Supplementary material
Source: MDPI journal article supplement (https://www.mdpi.com/2308-3417/9/3/63)
Supplement: s1 [file s1]

**Table S3.** Partial Spearman rank correlations of the geriatric ICS scores and subscales, Trait aR, SOC, SF-12, KPI, GDS stratified by diagnostic groups.

|                              | 1              | 2              | 3             | 4              | 5              | 6              | 7             | 8              | 9              |
|------------------------------|----------------|----------------|---------------|----------------|----------------|----------------|---------------|----------------|----------------|
| 1 ICS SumScore               | 1              | <b>.943**</b>  | <b>.470**</b> | <b>.455**</b>  | <b>.493**</b>  | <b>.399**</b>  | <b>.542**</b> | <b>.221*</b>   | <b>-.348**</b> |
| 2 ICS Coherence & Resilience | <b>.943**</b>  | 1              | .150          | <b>.392**</b>  | <b>.474*</b>   | <b>.334**</b>  | <b>.564**</b> | <b>-.237**</b> | <b>-.373**</b> |
| 3 ICS Thermo Coherence       | <b>.470**</b>  | .150           | 1             | <b>.331**</b>  | <b>.206*</b>   | <b>.299**</b>  | .113          | .028           | -.044          |
| 4 Trait aR                   | <b>.455**</b>  | <b>.392**</b>  | <b>.331**</b> | 1              | <b>.374**</b>  | <b>.466**</b>  | <b>.266**</b> | <b>.315**</b>  | <b>-.330**</b> |
| 5 SOC                        | <b>.493**</b>  | <b>.474*</b>   | <b>.206*</b>  | <b>.374**</b>  | 1              | .177           | <b>.460**</b> | .077           | <b>-.270**</b> |
| 6 SF-12 physical             | <b>.399**</b>  | <b>.334**</b>  | <b>.299**</b> | <b>.466**</b>  | .177           | 1              | -.034         | <b>.473**</b>  | -.284          |
| 7 SF-12 psychological        | <b>.542*</b>   | <b>.564**</b>  | .113          | <b>.266**</b>  | <b>.460**</b>  | -.034          | 1             | .103           | -.213          |
| 8 KPI                        | <b>.221*</b>   | <b>-.237**</b> | .028          | <b>.315**</b>  | .077           | <b>.473**</b>  | .103          | 1              | <b>-.391**</b> |
| 9 GDS                        | <b>-.348**</b> | <b>-.373**</b> | -.044         | <b>-.330**</b> | <b>-.270**</b> | <b>-.284**</b> | <b>-.213*</b> | <b>-.391**</b> | 1              |

\* p <.05, \*\* p <.001 Partial Spearman rho, 2-tailed in bold
