# Supplementary material
Source: MDPI journal article supplement (https://www.mdpi.com/2308-3417/9/3/63)
Supplement: s1 [file s1]

**Table S2.** Items of the ICS with factor loading, factor assignment and explained variance, alpha if item deleted value and item-total correlation. Cronbach's alpha mean and standard deviation are presented for the sum score, and subscales.

| ICS Items (10)<br>n = 104 patients                          | Factor loadings |               |             |             | Item-Scale Statistics            |                       |                       |
|-------------------------------------------------------------|-----------------|---------------|-------------|-------------|----------------------------------|-----------------------|-----------------------|
| Items                                                       | 1               |               | 2           |             | Item total correlation           | Means (SD)<br>t1      | Alpha if item deleted |
| <b><i>Subscale 1: Internal Coherence and Resilience</i></b> | 70-96 years     | 30-83 years * |             |             | ICS-elderly version: 70-96 years |                       |                       |
| 5. Confidence during day                                    | .75             | .86           |             |             | .635                             | 4.4 (0.78)            | .677                  |
| 1. Moments of comfort                                       | .65             | .72           |             |             | .502                             | 4.2 (0.86)            | .669                  |
| 10. Being on the right path                                 | .59             | .71           |             |             | .334                             | 4.4 (0.78)            | .697                  |
| 9. Feeling secure                                           | .60             | .84           |             |             | .353                             | 4.3 (0.90)            | .694                  |
| 4. Health condition                                         | .57             | .64           |             |             | .459                             | 3.8 (0.85)            | .677                  |
| 7. Ideas to solve problems                                  | .67             | .73           |             |             | .500                             | 4.3 (1.10)            | .665                  |
| 8. Feeling of coherence                                     | .48             | .77           |             |             | .278                             | 4.1 (1.00)            | .708                  |
| 6. Feeling of courage                                       | .46             | .58           |             |             | .273                             | 4.6 (0.91)            | .707                  |
| <b><i>Subscale 2: Thermo Coherence</i></b>                  |                 |               | 70-96 years | 30-83 years |                                  |                       |                       |
| 2. I was cold                                               |                 |               | .86         | .90         | .184                             | 4.5 (0.92)            | .722                  |
| 3. I felt warm                                              |                 |               | .81         | .89         | .267                             | 4.4 (0.87)            | .707                  |
| <b>Mean Sum Score (SD)</b>                                  |                 |               |             |             |                                  | 42.8 (4.76)           |                       |
| <b>Cronbach's Alpha = .72</b>                               | .75             |               | .73         |             |                                  | Test-retest rtt = .53 |                       |
