# Supplementary material
Source: MDPI journal article supplement (https://www.mdpi.com/2308-3417/9/3/63)
Supplement: s1 [file s1]

**Table S4.**  $p < 0.05^*$ ;  $p < 0.01^{**}$  in bold; Aligned Rank Test ( $p$ -Value) for Healthy Control Group, Longterm Oncology (LongONCO), Shortterm Oncology (ShortONCO), Longterm Diabetes (LongDIAB) and Shortterm Diabetes (ShortDIAB) † significant group comparison.

| <b>ICS<br/>Mean (SD)<br/>n = 104</b> | Healthy Control<br>Group<br>(n = 51) | LongONCO<br>(> 5 years)<br>(n = 19) | ShortONCO<br>(≤ 5 years)<br>(n = 10) | LongDIAB<br>(> 5 years)<br>(n = 17) | ShortDIAB<br>(> 5 years)<br>(n = 5) | <b>Aligned Rank Test<br/><math>p</math>-Values</b>                                                           |
|--------------------------------------|--------------------------------------|-------------------------------------|--------------------------------------|-------------------------------------|-------------------------------------|--------------------------------------------------------------------------------------------------------------|
| ICS sum score                        | 43.2 (3.7)                           | 44.3 (5.7)                          | 42.5 (4.1)                           | 41.4 (5.3)                          | 42.4 (6.6)                          | <b>.03*</b> ; HC↔LongONCO †<br><b>.01**</b> LongONCO↔LongDIAB †                                              |
| ICS coherence<br>& resilience        | 34.4 (3.4)                           | 34.8 (4.9)                          | 34.0 (3.0)                           | 32.6 (4.6)                          | 33.0 (5.8)                          | <b>&lt;.01*</b> LongONCO↔LongDIAB †<br><b>.03*</b> <b>ShortDIAB</b> ↔LongDIAB †<br><b>.04*</b> LongONCO↔HC † |
| ICS<br>thermo<br>coherence           | 8.8 (1.7)                            | 9.4 (1.1)                           | 8.5 (2.2)                            | 8.8 (1.4)                           | 9.4 (0.9)                           | -                                                                                                            |
