# Supplementary material
Source: MDPI journal article supplement (https://www.mdpi.com/2308-3417/9/3/63)
Supplement: s1 [file s1]

**Table S1.** Demographic Characteristics of the geriatric sample.

|                               | Groups                       |       |                             |       |                               |       | <i>p</i> -value         |
|-------------------------------|------------------------------|-------|-----------------------------|-------|-------------------------------|-------|-------------------------|
| Variables                     | Oncology Group<br>(O) n = 31 |       | Diabetes Group<br>(D) n =22 |       | Healthy Control<br>(C) n = 51 |       |                         |
|                               | M                            | SD    | M                           | SD    | M                             | SD    |                         |
| Age (in years)                | 80.61                        | 6.68  | 80.32                       | 4.90  | 81.16                         | 6.98  | .839                    |
| range                         | 71-94                        |       | 72-87                       |       | 70-96                         |       |                         |
|                               | N                            | in %  | N                           | in %  | N                             | in %  |                         |
| Gender                        |                              |       |                             |       |                               |       | .316                    |
| Female                        | 19                           | 61.29 | 11                          | 50.00 | 35                            | 68.63 |                         |
| Male                          | 12                           | 38.71 | 11                          | 50.00 | 16                            | 31.37 |                         |
| Living Situation with partner | 21                           | 67.74 | 12                          | 54.55 | 20                            | 39.22 | .012**↓<br>.040*; O↔H↓  |
| Children (yes)                | 27                           | 87.10 | 22                          | 100   | 38                            | 74.51 | .009**↓<br>.021*; D↔H ↓ |
| Family status                 |                              |       |                             |       |                               |       | .278                    |
| Single                        | 3                            | 9.68  | 0                           | 0     | 5                             | 9.80  |                         |
| Married                       | 18                           | 58.06 | 11                          | 50.00 | 20                            | 39.22 |                         |
| Divorced                      | 3                            | 9.68  | 2                           | 9.09  | 2                             | 3.92  |                         |
| Widowed                       | 7                            | 22.58 | 9                           | 40.90 | 23                            | 45.10 |                         |
| Education                     |                              |       |                             |       |                               |       | .235                    |
| Junior High School            | 8                            | 25.81 | 13                          | 59.09 | 15                            | 29.41 |                         |
| Secondary School              | 10                           | 32.26 | 4                           | 18.18 | 15                            | 29.41 |                         |
| A-Level                       | 12                           | 38.71 | 5                           | 22.73 | 16                            | 31.73 |                         |
| Other                         | 1                            | 3.23  | 0                           | 0     | 3                             | 5.88  |                         |
| Without graduation            | 0                            | 0     | 0                           | 0     | 2                             | 3.92  |                         |
| Higher Education              |                              |       |                             |       |                               |       | .257                    |
| Apprenticeship                | 10                           | 32.26 | 11                          | 50.00 | 17                            | 33.33 |                         |
| Vocational school             | 3                            | 9.68  | 0                           | 0     | 8                             | 15.69 |                         |
| University of Applies Science | 5                            | 16.13 | 4                           | 18.18 | 7                             | 13.73 |                         |
| University                    | 10                           | 32.36 | 4                           | 18.18 | 14                            | 27.45 |                         |
| Others                        | 2                            | 6.45  | 0                           | 0     | 4                             | 7.84  |                         |
| No degree                     | 1                            | 3.23  | 3                           | 13.64 | 1                             | 1.96  |                         |

$p < 0.05^*$ ;  $p < 0.01^{**}$  in bold; Chi-Square-Tests ( $p$ -Value) for gender, living situation, children, family status, education and work ↓ significant group comparison for O↔H and D↔H; Kruskal-Wallis-Test ( $p$ -Value).
